# Supplementary material for: Spatial-temporal evolution and influencing factors of ecological resilience in urban agglomerations: a case study of Shanxi section of the Yellow River Basin
Source: Frontiers journal article supplement (doi:10.3389/fenvs.2024.1385604), 2024-03-21
Supplement: Table_1.XLSX [file Table_1.XLSX]

## Sheet: Sheet2
	Index	X1	X2	X3	X4	X5	X6	X7	X8	X9	X10	X11	X12	X13	X14	X15	Initial data: https://tjj.shanxi.gov.cn/tjsj/, https://www.mohurd.gov.cn/gongkai/fdzdgknr/sjfb/tjxx/jstjnj/index.html, https://slt.shanxi.gov.cn/, https://sthjt.shanxi.gov.cn/zwgk/hjgb/hjzkgb/index.shtml; Ratio of expenditure on energy conservation and environmental protection(ten-thousand Yuan), Ratio of research and experimental development funds (R&D)（billion yuan）from Statistical Bulletin of …
	Year	Water supply per ten-thousand Yuan GDP (m3/ten- thousand yuan)	Comprehensive power consumption per ten-thousand Yuan GDP（kw·h/ten-thousand yuan）	Occupied area of construction land per ten-thousand Yuan GDP (km2/yuan)	Industrial sulfur dioxide emissions per ten-thousand Yuan GDP (t/ten- thousand yuan)	Total water resources per unit area (m3/km2)	Normalized vegetation index	Green coverage rate in built-up area (%)	Excellent air days (day)	Centralized treatment rate of sewage treatment plant (%)	Harmless treatment rate of municipal solid waste (%)	Comprehensive utilization rate of general industrial solid waste (%)	Ratio of expenditure on energy conservation and environmental protection to local fiscal expenditure (%)	Ratio of research and experimental development funds (R&D) to GDP (%)	The proportion of science and technology expenditure in local fiscal expenditure (%)	Patent licensing quantity index(number)	Water supply (billion cubic meters)	Comprehensive power consumption (ten- thousand kw·h)	Occupied area of construction land (ten-thousand km2)	Industrial sulfur dioxide emissions (t)	Ten-thousand Yuan GDP (yuan)	Administrative area (km2)	Total water resources (ten-thousand km2 )	Ratio of expenditure on energy conservation and environmental protection (ten-thousand Yuan)	Ratio of research and experimental development funds (R&D)(billion yuan)	The proportion of science and technology expenditure (billion yuan)	Local fiscal expenditure (billion yuan)
Taiyuan	2021	14.9227	0.0623027	6.61179e-06	0.00016323	13.6803	0.690994	46.59	224	100	100	40	0.0347703	0.0223953	0.0547065	16696	7.6428	3190900	338.63	8360	51216058	6988	9.5598	218700	114.7	344096	6289857
Jincheng	2021	21.5429	0.110394	2.60508e-06	0.000226467	39.2691	0.756524	46.06	253	99.4	100	50	0.0923891	0.00805264	0.00879165	1665	4.1199	2111202	49.82	4331	19124162	9425	37.0111	269896	15.4	25683	2921296
Shuozhou	2021	35.229	0.0621578	3.44983e-06	0.000295851	6.24151	0.625142	43.7	301	97.85	100	40	0.031	0.00183015	0.00625756	1537	5.0048	883045	49.01	4203	14206497	10625	6.6316	64298	2.6	12979	2074132
Jinzhong	2021	35.5432	0.116351	6.68856e-06	0.000612169	16.3842	0.727855	42.29	270	97.45	94.33	88	0.12214	0.0109035	0.00659947	3353	6.5522	2144866	123.3	11285	18434453	16392	26.8569	448031	20.1	24208	3668171
Yuncheng	2021	80.5458	0.151555	2.21473e-06	0.000890569	19.6135	0.692172	44.43	227	96	100	35	0.0418948	0.00954668	0.00610722	3111	16.5366	3111527	45.47	18284	20530692	14183	27.8178	167086	19.6	24357	3988230
Xinzhou	2021	50.1677	0.10347	2.73945e-06	0.000625766	7.66801	0.674002	44	278	96.58	100	38	0.07622	0.00208267	0.00869091	1298	6.7447	1.39108e+06	36.83	8413	13444312	25236	19.351	299963	2.8	34203	3935489
Linfen	2021	37.6257	0.110988	2.82697e-06	0.000550572	11.1833	0.726698	41.99	194	99.46	100	72.2	0.0538202	0.013145	0.00185761	2248	7.1845	2119276	53.98	10513	19094673	20275	22.6742	221671	25.1	7651	4118735
Lvliang	2021	27.3143	0.0950303	1.5608e-06	0.000947538	7.35708	0.664033	43.07	281	100	99.74	77.7	0.0477535	0.00738642	0.00375806	1726	5.6578	1968428	32.33	19627	20713688	21239	15.6257	194213	15.3	15284	4066994
Taiyuan	2020	19.3971	0.0707927	7.95449e-06	0.000204201	10.2393	0.683276	46.59	224	100	100	36	0.0364875	0.0219346	0.053799	12120	8.05612	2940200	330.37	8481	41532510	6988	7.1552	236200	91.1	348265	6473448
Jincheng	2020	29.2176	0.14808	3.46703e-06	0.000327975	10.0212	0.765326	44.64	243	99.8	100	50	0.080517	0.0092585	0.0122348	1126	4.1656	2111202	49.43	4676	14257166	9425	9.445	228670	13.2	34747	2840023
Shuozhou	2020	43.6922	0.0802409	4.45346e-06	0.000612453	5.75746	0.649572	43.7	285	97.11	100	38	0.037	0.00208997	0.00228865	506	4.8083	883045	49.01	6740	11004929	10625	6.1173	73365	2.3	4538	1982824
Jinzhong	2020	45.8024	0.146032	8.3948e-06	0.00049545	8.10298	0.730276	42.32	267	96.9	99.84	88	0.0846343	0.0125275	0.00686574	2449	6.7273	2144866	123.3	7277	14687660	16392	13.2824	338661	18.4	27473	4001461
Yuncheng	2020	98.6786	0.189306	2.63682e-06	0.00144374	7.81203	0.704331	42.95	242	95.07	100	35	0.039091	0.0139324	0.00704327	2555	16.2193	3111527	43.34	23730	16436485	14183	11.0798	163268	22.9	29417	4176614
Xinzhou	2020	63.2886	0.134461	3.51743e-06	0.00169009	7.31075	0.69655	43.41	269	95.51	100	38	0.0740954	0.00251314	0.00235331	753	6.5476	1.39108e+06	36.39	17485	10345625	25236	18.4494	299963	2.6	9527	4048335
Linfen	2020	47.5305	0.140801	3.58633e-06	0.00093804	5.35857	0.735067	41.72	225	98.8	100	72.2	0.0498149	0.0117596	0.00196603	1521	7.1541	2119276	53.98	14119	15051595	20275	10.8645	218868	17.7	8638	4393625
Lvliang	2020	38.3053	0.127983	2.10203e-06	0.00196282	6.81473	0.696704	41.13	303	97.04	100	77.7	0.0636241	0.00754207	0.00303162	1397	5.8915	1968428	32.33	30189	15380390	21239	14.4738	293396	11.6	13980	4611397
Taiyuan	2019	20.5852	0.0716976	1.19113e-05	0.000221777	8.38666	0.709172	45.93	200	95.22	100	32.13	0.0279091	0.0209577	0.0380055	7504	8.2674	2879514	478.38	8907	40161904	6988	5.8606	170400	84.17	232044	6105530
Jincheng	2019	32.0996	0.15579	3.53243e-06	0.000653061	8.62907	0.772906	45.65	184	100	100	53	0.0742294	0.0104785	0.0112542	743	4.35	2111202	47.87	8850	13551562	9425	8.1329	187444	14.2	28419	2525199
Shuozhou	2019	46.3896	0.0835679	4.63811e-06	0.00103655	4.75765	0.683737	43.7	263	97.5	100	40	0.0342	0.00179808	0.00341132	305	4.9019	883045	49.01	10953	10566800	10625	5.055	65978	1.9	6581	1929168
Jinzhong	2019	48.5101	0.148165	5.69212e-06	0.000634284	5.72566	0.741072	37.04	229	96.6	99.92	88	0.0617937	0.0106382	0.00735248	1523	7.0224	2144866	82.4	9182	14476159	16392	9.3855	229291	15.4	27282	3710587
Yuncheng	2019	105.449	0.194616	2.68742e-06	0.00187804	6.62582	0.695109	37.76	198	100	100	35	0.0426124	0.0136463	0.00411185	1411	16.3819	3023427	41.75	29176	15535353	14183	9.3974	159450	21.2	15386	3741868
Xinzhou	2019	67.7096	0.133352	3.66955e-06	0.0016096	7.14765	0.732339	39	259	96.65	100	38	0.0456004	0.00211763	0.00363343	485	6.7146	1322421	36.39	15962	9.91676e+06	25236	18.0378	169152	2.1	13478	3709444
Linfen	2019	56.1945	0.14632	3.72692e-06	0.00276645	4.25218	0.710957	39.41	174	97	100	72.2	0.0594029	0.00925172	0.0020012	830	8.1391	2119276	53.98	40068.7	14483799	20275	8.6213	244267	13.4	8229	4112039
Lvliang	2019	40.6437	0.142404	2.14529e-06	0.00270407	6.05758	0.71351	40	280	94	97.19	77.7	0.0593652	0.0067683	0.0049561	861	6.1251	2146065	32.33	40751	15070248	21239	12.8657	255663	10.2	21344	4306614
Taiyuan	2018	20.1372	0.0750433	8.72704e-06	0.000240264	8.61234	0.724422	44.67	170	100	100	40	0.0350626	0.0230456	0.0461688	1601	7.82225	2915041	339	9333	38844778	6988	6.0183	190200	89.52	250447	5424589
Jincheng	2018	32.1625	0.147893	3.54107e-06	0.000903057	13.0752	0.80237	45.8	161	100	100	47.41	0.0753261	0.0118356	0.00659069	639	4.3479	1999300	47.87	12208	13518530	9425	12.3234	172089	16	15057	2284586
Shuozhou	2018	46.4944	0.0794538	3.37827e-06	0.00142319	6.94974	0.681136	40.16	242	95.14	100	40	0.0337	0.00140761	0.00322975	20	4.9546	846686	36	15166	10656332	10625	7.3841	58599	1.5	5616	1738833
Jinzhong	2018	50.5242	0.132436	5.52845e-06	0.00061177	7.68438	0.788477	37.21	210	96.3	100	96.3	0.047299	0.00801324	0.00708878	94	7.3139	1917153	80.03	8856	1.4476e+07	16444	12.6362	152604	11.6	22871	3226368
Yuncheng	2018	100.058	0.20611	2.76556e-06	0.00229339	6.91553	0.722087	37.21	176	98	100	35	0.0341286	0.0109298	0.00543608	1425	15.1051	3111527	41.75	34622	15096407	14183	9.8083	115311	16.5	18367	3378723
Xinzhou	2018	67.6008	0.147578	3.65776e-06	0.00180168	8.7669	0.734291	38.03	227	95.69	100	63.7	0.0352296	0.00192088	0.00438876	479	6.6866	1459742	36.18	17821	9.8913e+06	25152	22.0505	110543	1.9	13771	3137790
Linfen	2018	56.331	0.135573	3.88877e-06	0.00154027	4.49899	0.771749	38.68	138	97.27	97.27	72.2	0.0523106	0.0040971	0.000289954	77	8.1119	1952304	56	22180.6	1.44004e+07	20275	9.1217	201879	5.9	1119	3859235
Lvliang	2018	42.3313	0.138591	2.27625e-06	0.00360011	8.83549	0.746603	40.58	252	89.11	88.04	77.7	0.0664395	0.00302749	0.00431725	32	6.0124	1968428	32.33	51133	14203195	21239	18.7657	271483	4.3	17641	4086166
Taiyuan	2017	22.9831	0.0799927	1.00231e-05	0.000288542	7.75816	0.716617	42.19	175	95.4	100	42.73	0.0489087	0.0213472	0.0386796	5503	7.7733	2705500	339	9759	33821819	6988	5.4214	234300	72.2	185297	4790558
Jincheng	2017	37.3336	0.167201	4.15098e-06	0.00157867	13.8976	0.800181	45.8	166	100	100	54.29	0.0536298	0.0105077	0.00745857	427	4.2991	1925375	47.8	18179	1.15154e+07	9425	13.0985	95682	12.1	13307	1784121
Shuozhou	2017	51.5974	0.0783651	4.78157e-06	0.001977	5.77111	0.676114	42.87	242	97.21	98.24	38	0.03276	0.00224439	0.00573448	12	5.0577	768153	46.87	19379	9802230	10625	6.1318	46428	2.2	8127	1417217
Jinzhong	2017	59.1514	0.136239	6.11087e-06	0.0016843	10.3443	0.777309	35.84	183	95.92	97.66	95.3	0.0354614	0.0060704	0.00880844	978	7.6005	1750562	78.52	21642	12849233	16392	16.9564	98911	7.8	24569	2789258
Yuncheng	2017	122.248	0.224667	3.12432e-06	0.0029985	10.0041	0.718576	36.06	161	98	100	35	0.022199	0.00853107	0.00687363	1037	16.3359	3002206	41.75	40068.7	13362914	14183	14.1888	67266	11.4	20828	3030131
Xinzhou	2017	76.0727	0.120938	4.13726e-06	0.00199144	7.25871	0.732065	37.06	213	95.32	100	70.8	0.0349414	0.00194399	0.00644097	341	6.6525	1057597	36.18	17415	8744923	25152	18.2571	101559	1.7	18721	2906549
Linfen	2017	58.7868	0.131501	4.05883e-06	0.00198521	5.50328	0.742078	38.37	128	93.25	92.2	72.2	0.0470999	0.00439284	0.00536426	90	7.7618	1736241	53.59	26211.4	13203300	20275	11.1579	157475	5.8	17935	3343427
Lvliang	2017	46.1169	0.127123	2.46733e-06	0.00472212	9.46429	0.727985	40.25	245	85.54	82.51	42.6	0.0452579	0.00190793	0.00778533	422	6.0428	1665715	32.33	61875	13103217	21239	20.1012	142732	2.5	24553	3153750
Taiyuan	2016	26.2623	0.0794569	1.21802e-05	0.015301	8.76073	0.705263	41.65	232	86.9	100	51.3	0.0485301	0.0237718	0.0196189	1596	7.7621	2348433	360	452236	29556045	6988	6.122	205800	70.26	83197	4240666
Jincheng	2016	41.4232	0.0166266	4.38371e-06	0.0262721	17.7457	0.792652	41.63	237	95.3	86.7	78	0.0465193	0.0103875	0.00561548	66	4.3467	174470	46	275684	1.04934e+07	9425	16.7253	80389	10.9	9704	1728079
Shuozhou	2016	54.6378	0.0657992	3.70345e-06	0.0315827	5.64461	0.646264	36.98	247	97.5	100	51.52	0.031868	0.00206957	0.00363855	26	5.0161	604079	34	289949	9180640	10625	5.9974	40683	1.9	4645	1276607
Jinzhong	2016	70.0575	0.0318954	6.67031e-06	0.0328693	11.0156	0.777915	37.52	226	95.24	95.51	95.5	0.0222284	0.00559067	0.00612291	87	7.644	348012	72.78	358638	10911041	16444	18.114	54942	6.1	15134	2471699
Yuncheng	2016	139.147	0.0296824	3.4157e-06	0.0546357	9.31404	0.71599	36.67	252	98	100	31.54	0.0214855	0.00760862	0.00464675	192	17.0079	362807	41.75	667811	12222982	14183	13.2101	61843	9.3	13375	2878358
Xinzhou	2016	92.8623	0.0170489	4.95716e-06	0.0105896	7.1875	0.720256	36.32	269	95.24	100	70	0.0296941	0.00167566	0.00428922	57	6.6502	122093	35.5	75836	7161357	25152	18.078	73508	1.2	10618	2475508
Linfen	2016	64.6785	0.022753	4.44665e-06	0.0362483	5.4657	0.747504	38.31	244	90.62	87.88	72.2	0.0438621	0.00398282	0.00301198	105	7.7949	274214	53.59	436856	1.20518e+07	20275	11.0817	136393	4.8	9366	3109586
Lvliang	2016	59.5745	0.00850491	2.48566e-06	0.0333181	7.96662	0.720541	38.08	287	82.72	83.67	74.24	0.0286426	0.0021099	0.00603441	44	5.9295	84650	24.74	331618	9953079	21239	16.9203	79011	2.1	16646	2758512
Taiyuan	2015	27.2942	0.0827543	1.21009e-05	0.0147452	6.10418	0.671038	40.3	230	93.24	100	56	0.0333433	0.0307091	0.030484	1413	7.4659	2263614	331	403333	27353442	6988	4.2656	140039	84	128030	4199913
Jincheng	2015	41.4097	0.0165225	4.42206e-06	0.0231239	10.6034	0.772048	42.56	263	95	100	78.19	0.0525982	0.0108629	0.0124521	74	4.3076	171874	46	240544	10402397	9425	9.9937	94737	11.3	22428	1801145
Shuozhou	2015	54.0088	0.0697988	4.4655e-06	0.034312	4.73045	0.589435	42.48	216	97.5	92.01	88.7	0.032764	0.00255235	0.00668652	19	4.8669	628978	40.24	309196	9011301	10625	5.0261	45310	2.3	9247	1382931
Jinzhong	2015	70.3775	0.0313552	6.05478e-06	0.043653	5.81162	0.754231	36.71	245	95.21	94	95.93	0.0219356	0.00535314	0.00789336	86	7.3623	328012	63.34	456661	10461155	16392	9.5264	52901	5.6	19036	2411647
Yuncheng	2015	137.992	0.0306648	3.55617e-06	0.0614977	8.24896	0.704819	40.59	237	98.8	100	41.23	0.0222609	0.00783636	0.00558048	150	16.2005	360009	41.75	721992	11740143	14183	11.6995	61651	9.2	15455	2769475
Xinzhou	2015	97.561	0.0183608	5.21112e-06	0.0111321	5.645	0.678285	33.7	255	95.06	48.66	70.93	0.0356954	0.00161471	0.00382612	51	6.6462	125080	35.5	75836	6812356	25152	14.1983	85905	1.1	9208	2406615
Linfen	2015	64.9224	0.0244833	4.46728e-06	0.0313534	4.03191	0.694463	37.8	266	86.7	79.39	73.65	0.036458	0.00447848	0.00313294	97	7.5382	284278	51.87	364047	1.16111e+07	20275	8.1747	104826	5.2	9008	2875251
Lvliang	2015	59.7949	0.00818005	2.53923e-06	0.0264323	5.42008	0.641325	38.08	270	81.11	83.78	73.34	0.0297554	0.00219711	0.00390053	52	5.7152	78185	24.27	252640	9558013	21239	11.5117	81534	2.1	10688	2740137
Taiyuan	2014	72.7704	0.205474	3.08468e-05	0.0354746	6.4263	0.717801	44.77	197	85.85	100	55.25	0.0396054	0.0865506	0.0438401	3516	7.2896	2058282	309	355358	10017256	6988	4.4907	127804	86.7	141469	3226934
Jincheng	2014	44.586	0.0159393	4.3442e-06	0.0266927	11.8639	0.77975	40.11	208	94.7	100	78	0.0480794	0.0112949	0.0122247	447	4.6185	165109	45	276500	1.03586e+07	9425	11.1817	77755	11.7	19770	1617219
Shuozhou	2014	49.1364	0.0579543	4.01032e-06	0.0403754	4.79961	0.597679	50.05	232	97.3	91.22	86.86	0.0316953	0.00269082	0.00678371	262	4.9304	581519	40.24	405131	10034100	10674	5.1231	45344	2.7	9705	1430634
Jinzhong	2014	66.1599	0.0295509	5.129e-06	0.0407714	7.52007	0.780886	37.92	241	96.6	96.6	79.45	0.0286073	0.00489298	0.00885969	515	6.8959	308012	53.46	424964	10423086	16392	12.3269	61918	5.1	19176	2164411
Yuncheng	2014	116.41	0.0207346	3.44534e-06	0.050997	12.2233	0.742713	34.19	209	98.8	96	44.6	0.0346125	0.0075731	0.00766733	797	13.9881	249151	41.4	612791	12016220	14181	17.3338	82643	9.1	18307	2387663
Xinzhou	2014	94.9217	0.0205339	5.05336e-06	0.0357035	5.78344	0.707015	32.11	225	95.01	46.11	70.92	0.0432835	0.00146985	0.00402286	386	6.4579	139700	34.38	242905	6803394	25152	14.5465	92606	1	8607	2139521
Linfen	2014	58.9966	0.0245391	4.3017e-06	0.0351258	6.37396	0.765293	37.37	240	82.65	76.14	71.68	0.0322392	0.00453332	0.00491803	595	7.1577	297718	52.19	426160	1.21324e+07	20275	12.9232	91263	5.5	13922	2830807
Lvliang	2014	51.3472	0.00722752	2.12921e-06	0.0209859	5.4238	0.71916	39.88	255	82.28	78.33	81.83	0.0309065	0.00181596	0.00600625	242	5.6551	79600	23.45	231127	11013462	21239	11.5196	81534	2	15845	2638085
Taiyuan	2013	31.1463	0.0953205	1.17702e-05	0.00368441	6.68253	0.704466	39.88	162	85	100	54.51	0.0251265	0.0348133	0.0354014	3452	7.5152	2299961	284	88900	24128724	6977	4.6624	80181	84	112969	3191090
Jincheng	2013	46.5727	0.0192995	4.26392e-06	0.00797024	12.0145	0.783251	39.34	208	95	95	78.34	0.0593473	0.0120165	0.0137417	589	4.8059	199154	44	82246	10319143	9425	11.3237	93363	12.4	21618	1573164
Shuozhou	2013	52.0508	0.0300089	3.92049e-06	0.0106101	6.16076	0.665271	50.05	232	97.24	80.17	86.67	0.0317564	0.00243569	0.0090978	214	5.3425	308012	40.24	108902	10264012	10674	6.576	49053	2.5	14053	1544659
Jinzhong	2013	70.3141	0.0301314	5.18475e-06	0.0101849	9.28386	0.757109	36.42	241	92.8	69.02	83.12	0.306914	0.00655431	0.0809191	536	7.1877	308012	53	104113	10222281	16392	15.2181	65567	6.7	17287	213633
Yuncheng	2013	133.721	0.0440077	3.63121e-06	0.0112919	7.0629	0.755483	33.85	209	98.8	96	64.1	0.0373988	0.0067537	0.00793418	710	15.2457	501738	41.4	128741	11401151	14181	10.0159	85774	7.7	18197	2293494
Xinzhou	2013	97.3574	0.0169136	4.81418e-06	0.00971909	7.52192	0.719808	31.13	225	68.11	42.93	80.85	0.0480572	0.00152734	0.00497379	379	6.3743	110739	31.52	63634	6547321	25117	18.8928	102592	1	10618	2134790
Linfen	2013	61.1085	0.0242503	4.12532e-06	0.00744347	7.8472	0.751711	37.91	240	82.15	48.19	80.85	0.0480418	0.00473893	0.00637778	556	7.4791	296800	50.49	91101	12239045	20275	15.9102	127438	5.8	16918	2652646
Lvliang	2013	46.6246	0.00704866	1.77926e-06	0.00882857	6.65394	0.70814	39.04	255	75.32	51.3	81.42	0.0278947	0.00284877	0.00885449	240	5.7283	86600	21.86	108468	12286015	21239	14.1323	81534	3.5	25881	2922924
Taiyuan	2012	33.2871	0.0999838	1.18541e-05	0.00440333	7.24409	0.697896	39.07	324	84.5	100	53.77	0.0467974	0.0307169	0.0344119	2361	7.6941	2311059	274	101780	23114326	6977	5.0542	129985	71	95583	2777613
Jincheng	2012	47.9111	0.0186043	4.14686e-06	0.00815343	12.0145	0.769078	39.81	208	95	99.24	80.75	0.0378476	0.0102684	0.0147775	466	4.8525	188427	42	82579	10128134	9425	11.3237	49136	10.4	19185	1298261
Shuozhou	2012	50.423	0.0509222	3.97172e-06	0.0113969	6.16076	0.62539	45.98	232	100	77.98	83.64	0.0321645	0.00377314	0.00894744	148	5.0782	512848	40	114780	10071198	10674	6.576	44666	3.8	12425	1388666
Jinzhong	2012	73.1867	0.0279773	5.06812e-06	0.0112894	9.28386	0.757935	37.6	241	92.8	53.36	81.61	0.0284375	0.00598038	0.00786943	379	7.2203	276013	50	111377	9865596	16392	15.2181	50801	5.9	14058	1786407
Yuncheng	2012	134.098	0.0456435	3.46231e-06	0.011387	7.0629	0.697566	32.92	209	98.8	95.87	63.44	0.0359512	0.0019651	0.00624528	515	14.3304	487769	37	121687	10686498	14181	10.0159	69280	2.1	12035	1927056
Xinzhou	2012	102.162	0.0176003	4.9924e-06	0.0105523	7.52192	0.698538	24.63	225	45.66	40.81	85.44	0.04082	0.00112732	0.00905698	244	6.3437	109288	31	65524	6209439	25117	18.8928	74100	0.7	16441	1815286
Linfen	2012	60.9551	0.0237302	4.09474e-06	0.00757272	7.8472	0.726527	37.39	240	81.12	42	73.34	0.0333686	0.00401284	0.0065442	400	7.4431	289765	50	92469	12210801	20275	15.9102	74353	4.9	14582	2228232
Lvliang	2012	48.3414	0.00617677	1.77664e-06	0.00116448	6.65394	0.697358	40	255	69	41.02	83.71	0.0330803	0.00276329	0.00758703	247	5.948	76000	21.86	14328	12304159	21239	14.1323	81534	3.4	18700	2464733
Note: X1 = Water supply × 10^8/Ten-thousand Yuan GDP; X2 = Comprehensive power consumption/Ten-thousand Yuan GDP; X3 = Occupied area of construction land/Ten-thousand Yuan GDP;X4 = Industrial sulfur dioxide emissions/Ten-thousand Yuan GDP; X5 = Total water resources× 10^4/Administrative area;X12 = Ratio of expenditure on energy conservation and environmental protection/Local fiscal expenditure; X…
